# Supplementary material
Source: publisher site journal article supplement (https://www.dovepress.com/article/313775)
Supplement: Supplementary file 1 [file get_supplementary_file.php]

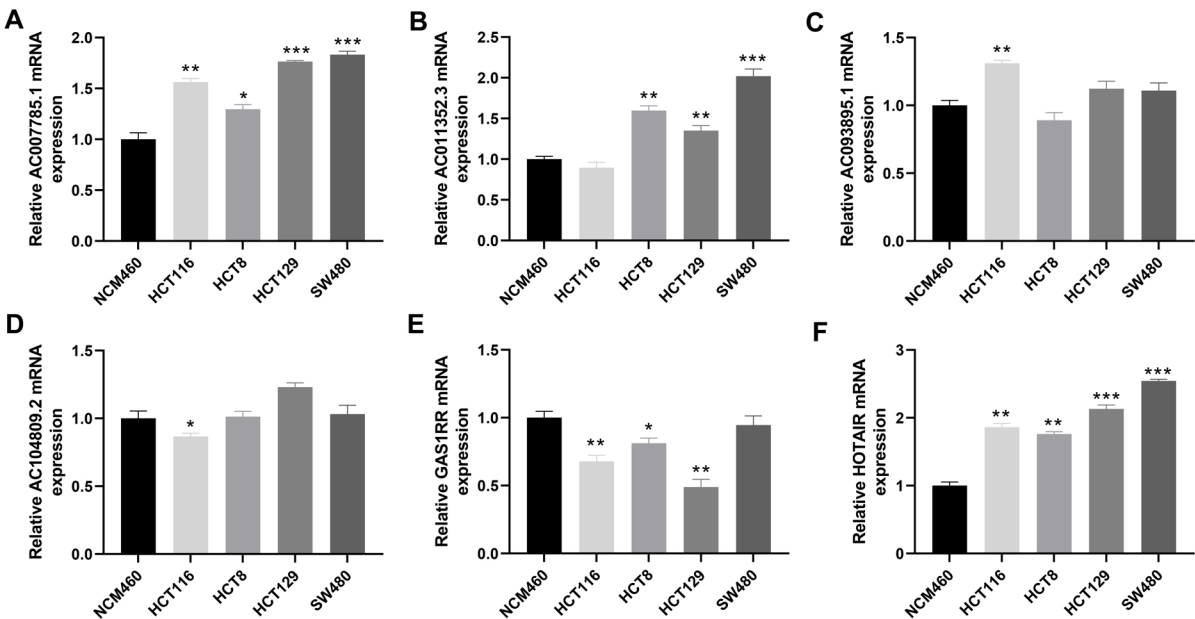

**Figure S1.** The qRT-PCR results of GAS1RR, AC011352.3, HOTAIR, AC093895.1, AC007785.1, and AC104809.2

Notes: **A:** The qRT-PCR results of AC007785.1, \* =  $P < 0.05$ , \*\* =  $P < 0.01$ , \*\*\* =  $P < 0.001$ ; **B:** The qRT-PCR results of AC011352.3, \*\* =  $P < 0.01$ , \*\*\* =  $P < 0.001$ ; **C:** The qRT-PCR results of AC093895.1, \*\* =  $P < 0.01$ ; **D:** The qRT-PCR results of AC104809.2, \* =  $P < 0.05$ ; **E:** The qRT-PCR results of GAS1RR, \* =  $P < 0.05$ , \*\* =  $P < 0.01$ ; **F:** The qRT-PCR results of HOTAIR, \*\* =  $P < 0.01$ , \*\*\* =  $P < 0.001$ .<sup>4</sup>
